# Supplementary material for: Discerning combining ability loci for divergent environments using chromosome segment substitution lines (CSSLs) in pearl millet
Source: PLoS One. 2019 Aug 28;14(8):e0218916. doi: 10.1371/journal.pone.0218916 (PMC6713397; doi:10.1371/journal.pone.0218916)
Supplement: S1 Table — (XLS) [file pone.0218916.s001.xls]

## Sheet: Suppl 1
Table S1 General combining ability (GCA ) values for 15 grain and stover yield - related traits using testcross hybrids of 85 CSSLs and 3 testerscontrol (CN), and moisture stress (MS) and across two moisture regimes (AMR) in summer 2010
Treatment/CSSL No.	FT	PH	PL	PD	PN	TN	PY	GY	DSY	TGM	GNP	BM	PHI	GHI	VGI
Control
71074	-2.05 **	3.54	0.05	-0.12	-8.68	-0.43*	75.35	5.46	26.41	-0.25	39.2	29.95	0	-0.01	4.18
71080	-2.83 **	2.76	-0.62	0.09	40.66 *	-0.28	-254.54	-105.54	52.52	0.37*	-233.8*	82.73	-0.03	-0.01	7.31
71085	-2.61 **	7.43 *	0.16	-0.04	3.66	-0.23	40.68	177.13	625.29*	-0.14	-34.8	727.62	-0.01	0	19.61
71118	-1.72 **	7.65 *	-0.07	-0.12	23.99	-0.18	-32.98	77.13	17.18	0.02	-28.13	-135.49	0.04	0.01	0.12
71134	-1.28 **	15.32 **	1.71 **	0.07	-8.12	-0.43*	-187.87	334.46	336.07	0.13	193.64	-433.27	-0.01	-0.03	-6.86
71174	-1.83 **	2.54	-0.4	-0.1	68.88 **	0.1	78.24	-71.21	29.52	0.02	-217.91*	1.29	-0.01	-0.03	4.39
71178	-1.39 **	6.65	0.49	0.09	19.77	-0.16	476.91	664.01 **	179.74	0.46*	0.31	95.95	0.02	0.01	4.52
71218	-2.16 **	7.43 *	-0.29	-0.20 **	13.88	-0.18	81.24	49.9	156.07	0.2	-58.58	91.18	0.01	-0.03	5.94
71220	-1.83 **	9.98 **	1.27 **	0.28 **	18.32	0.12	212.24	73.9	-86.71	0.1	-46.02	-55.38	-0.01	-0.01	1.87
71268	-1.39 **	4.87	0.6	0.03	40.66 *	-0.13	296.13	211.35	381.96	-0.5**	45.64	962.73	0.02	0.02	21.22
71273	-2.16 **	3.76	-0.07	-0.04	49.88 *	-0.04	441.8	329.01	61.52	-0.1	-8.13	163.84	0.03	-0.01	7.74
71281	-1.50 **	7.20 *	0.6	0.12	38.88	-0.1	136.91	-55.1	188.07	-0.24	-105.36	113.4	-0.02	-0.05	4.3
72001	-1.61 **	2.87	-0.4	0.15 *	34.55	-0.25	762.02 **	601.68 **	628.41*	0.85**	31.87	1675.06*	0.05	0.04	35.38**
72030	-1.83 **	0.76	0.05	-0.03	56.66 **	0.07	425.8	352.9	257.29	0.26	-56.8	967.62	0.04	0.05	22.45
72038	-1.94 **	4.2	0.05	0.07	41.88 *	-0.13	646.80 **	653.57 **	747.52**	0.75**	55.64	1678.84*	0.08	0.05	36.42**
72039	-1.61 **	7.65 *	0.38	-0.06	7.32	-0.23	-0.09	161.57	-449.82	0.66**	-59.02	-1128.27	-0.01	-0.08*	-18.99
72054	-1.39 **	5.2	0.38	0.06	33.88	-0.13	652.24 **	573.35 **	289.63	0.78**	35.75	777.18	0.06	0.02	17.79
72060	-1.61 **	-0.24	0.71	-0.02	12.77	-0.29	508.35 *	560.79 **	466.85	0.99**	73.2	1259.73	0.08 *	0.06	27.08*
72066	-2.16 **	2.09	0.71	0.07	9.88	-0.24	550.35 *	588.24 **	238.29	0.79**	142.42	591.84	0.09 *	0.02	15.87
72067	-1.28 **	2.98	-0.07	0.08	-16.23	-0.55**	591.13 *	604.13 **	476.07	0.44*	279.75**	1351.62*	0.08	0.06	28.4*
72069	-2.28 **	-0.57	0.38	0.12	28.99	-0.16	433.24	266.01	630.63*	0.34	-28.47	1348.51*	0.02	0.02	30.92*
73014	-1.39 **	3.76	0.27	0.04	48.43 *	0.25	-260.98	-624.21 **	611.18*	-0.72**	-266.36**	634.51	-0.12 **	-0.08*	14.65
73023	0.06	9.65 **	0.71	0.01	15.88	-0.05	-194.43	-244.65	683.74**	-0.49**	-114.47	773.73	-0.02	-0.03	13.81
73029	-1.61 **	8.65 *	0.49	0.07	1.77	-0.1	33.24	-97.54	558.63*	-0.54**	-21.02	876.18	-0.04	-0.02	19.73
73046	-0.61	7.43 *	1.27 **	0.08	39.99 *	0.02	-685.98 **	-549.65 **	307.41	-1.29**	-256.02*	-757.27	-0.12 **	-0.09*	-14.02
73048	-0.05	8.54 *	0.38	-0.07	32.21	0.12	-529.20 *	-539.21 **	729.96**	-1.15**	-157.13	176.06	-0.11 **	-0.08*	3.26
73052	-2.50 **	3.76	0.16	0	50.99 *	0.32	-11.09	-244.99	-100.59	-0.58**	-181.36	-699.38	-0.05	-0.08*	-9.3
73079	-1.61 **	3.65	0.27	0.18 **	53.10 **	0.06	68.35	-40.21	92.41	-0.24	-135.36	128.73	-0.01	-0.02	5.35
73082	0.06	11.20 **	-0.84 *	0.09	22.77	-0.2	569.02 *	260.9	1025.74**	-0.12	27.98	1879.29**	0	-0.01	34.83**
73086	-0.61	7.43 *	-0.29	0.07	20.77	-0.06	-300.87	-403.32 *	90.63	-0.57**	-174.25	-364.82	-0.05	-0.08*	-5.79
73087	-1.61 **	2.76	-0.95 *	0.01	31.43	-0.07	-124.87	-259.32	503.29*	-0.29	-178.25	662.95	-0.04	-0.03	15.97
74015	5.17 **	9.87 **	0.82 *	0.03	-54.34 **	-0.03	-67.65	-190.99	-353.26	-0.19	159.87	-471.05	-0.02	-0.03	-18.88
74411	1.95 **	-0.35	1.05 *	0.04	-96.68 **	-0.23	-890.65 **	-524.32 **	-745.93**	-0.47*	67.75	-1553.38*	-0.06	0.01	-33.04**
74449	3.84 **	3.98	1.05 *	0.1	-74.79 **	0.07	-384.76	-567.65 **	-766.82**	-0.22	-6.25	-1322.38*	-0.08	-0.01	-32.87**
74481	2.61 **	8.20 *	0.16	0.03	-43.12 *	0.31	-303.65	-217.87	-431.93	-0.24	86.42	-450.71	-0.01	0.03	-14.62
74526	3.28 **	3.98	0.82 *	0.02	-42.68 *	0.34	-340.65	-298.65	-575.71*	-0.03	-10.8	-1063.82	-0.01	-0.02	-26.94*
74535	3.28 **	-0.8	-0.18	-0.05	-35.9	0.28	-172.87	-267.87	-457.37	-0.21	29.75	-731.16	-0.03	-0.03	-20.68
74539	4.28 **	4.54	0.82 *	-0.01	-55.12 **	0.1	-153.43	-176.1	-351.82	-0.45*	44.87	-220.49	-0.01	0.03	-12.74
74567	3.72 **	-18.13 **	0.05	0.07	-64.79 **	0.1	-832.87 **	-569.10 **	-709.71**	0.05	-85.58	-1903.6**	-0.07	-0.04	-42.21**
74570	3.50 **	5.98	0.6	0.05	-57.34 **	0.35	-92.54	-119.43	-522.93*	-0.25	222.53*	-751.82	-0.01	-0.01	-21.65
74574	4.17 **	1.54	-0.07	0.03	-73.12 **	-0.03	-168.98	-203.1	-573.82*	-0.05	249.87*	-855.82	-0.01	-0.01	-23.92
74601	3.72 **	2.43	1.16 **	0.03	-25.9	0.4*	-144.65	-652.54 **	-295.04	-0.08	-252.13*	-155.16	-0.13 **	-0.05	-11.11
74605	3.61 **	-3.91	0.49	0.04	-62.23 **	0.18	-495.54 *	-418.32 *	-858.04**	-0.38*	57.98	-1746.05**	-0.03	-0.04	-38.82**
74607	4.17 **	0.2	-0.29	0.06	-51.57 *	0.31	-293.2	-503.10 **	-730.26**	-0.01	-16.47	-1178.27	-0.07	-0.01	-29.94*
74614	2.72 **	5.65	0.6	0.04	-57.90 **	0.34	-94.09	-209.99	-174.37	0.38*	57.87	16.29	-0.03	0.01	-6.16
74618	2.95 **	-1.02	0.82 *	0.04	-40.23 *	0.36*	-123.98	-230.87	-486.04*	-0.07	61.64	-712.71	-0.03	-0.01	-20.33
74633	3.06 **	2.32	0.93 *	0.01	-83.57 **	-0.07	-997.43 **	-701.32 **	-537.71*	-0.17	-205.8*	-1477.94*	-0.14 **	-0.06	-32.56*
74685	4.28 **	2.09	0.49	-0.01	-53.34 **	0.27	-423.32	-651.32 **	-569.48*	-0.54**	-113.47	-708.27	-0.09 *	-0.03	-20.91
74698	3.95 **	1.65	0.05	0	-64.79 **	0.06	-4.76	-150.43	-623.26*	-0.12	186.87	-1107.49	-0.02	-0.04	-28.84*
74779	4.39 **	8.20 *	0.71	0	-42.01 *	0.25	15.57	-252.1	-212.37	-0.29	64.53	87.73	-0.04	0	-8.2
74875	4.39 **	1.65	1.16 **	0.08	-100.01 **	-0.11	-633.98 *	-894.32 **	-407.59	0.02	-204.8*	-1038.49	-0.18 **	-0.08*	-27.19*
75035	1.06 *	-18.13 **	-0.07	-0.30 **	-61.45 **	0.01	-631.32 *	-166.32	-886.26**	-0.1	78.09	-1823.6**	0.01	0.02	-37.38**
75048	2.28 **	-13.35 **	0.6	-0.35 **	-39.12	0.29	-464.32	-32.32	-811.15**	-0.82**	312.53**	-1441.27*	0.08 *	0.04	-30.6*
75064	3.39 **	-27.02 **	-0.18	-0.29 **	-67.12 **	-0.1	-694.98 **	-27.54	-375.93	-0.39*	191.2	-977.38	0.06	0.07	-25.42*
75094	1.61 **	-10.46 **	1.05 *	-0.14 *	-76.57 **	0.06	-716.98 **	-246.32	-405.93	0.02	98.09	-1156.38	0	0.04	-25.12*
75126	2.61 **	-29.46 **	-0.07	-0.18 **	-116.23 **	-0.48**	-613.65 *	-192.1	-727.71**	0.28	-50.69	-1766.16**	-0.02	-0.03	-38.13**
75133	2.95 **	-19.02 **	-1.18 **	-0.21 **	-54.34 **	0.05	-181.09	-63.21	-476.26	-0.42*	278.09**	-372.38	0.03	0.06	-13.56
75134	2.95 **	-16.80 **	-0.95 *	-0.28 **	-62.34 **	0.13	-312.54	105.35	-486.82*	0.07	331.64**	-514.82	0.10 *	0.1**	-15.93
75156	0.5	-20.02 **	-0.84 *	-0.22 **	-62.57 **	-0.21	-297.76	126.9	-610.04*	-0.14	432.31**	-623.05	0.09 *	0.11**	-13.49
75159	1.84 **	-18.57 **	-0.18	-0.25 **	-18.23	0.62**	-96.2	249.13	-314.82	-0.31	283.2**	-126.38	0.10 *	0.1**	-7.08
75173	2.06 **	-16.91 **	0.27	-0.41 **	-87.90 **	-0.38*	-219.54	243.57	-424.82	0.35	511.75**	-359.49	0.12 **	0.11**	-11.39
75180	2.61 **	-20.13 **	-0.73	-0.28 **	-48.45 *	0.29	15.02	360.35 *	-631.04*	-0.26	455.2**	-880.05	0.11 **	0.07	-22.25
86014	-2.50 **	2.43	-0.07	0.02	32.1	-0.12	365.35	237.35	324.29	0.29	-49.36	974.18	0.03	0.04	24.25
86019	-2.28 **	-1.46	-0.73	0.1	49.99 *	0.05	545.02 *	483.13 **	496.18*	0.28	33.31	1325.73*	0.06	0.05	30.62*
86025	-1.83 **	6.43	0.38	0.35 **	33.77	0.06	177.68	-45.21	357.41	0.75**	-195.25	819.84	-0.01	0.01	19.38
86027	-2.05 **	4.32	-0.51	0.29 **	81.99 **	0.11	511.57 *	487.57 **	-89.37	0.26	-92.02	-283.94	0.05	-0.04	-2.11
86042	-2.05 **	1.54	-0.18	-0.09	30.21	0.02	294.13	300.79	243.63	0.36	-19.02	365.62	0.05	-0.01	10.92
86052	-2.28 **	6.43	-0.4	0.32 **	46.43 *	-0.06	293.02	179.46	351.18	1.25**	-149.8	928.62	0.03	0.03	22.68
86053	0.28	10.76 **	-0.18	0.29 **	9.77	-0.16	666.57 **	800.57 **	526.96*	0.82**	206.09*	902.06	0.12 **	0.02	15.31
86074	-1.72 **	4.54	-0.4	-0.04	36.32	-0.15	256.02	538.24 **	327.96	0.31	128.98	395.73	0.11 **	0.03	10.19
86096	-2.05 **	9.20 **	-0.07	-0.06	63.99 **	0.03	605.35 *	643.57 **	145.85	0.83**	-51.25	430.95	0.08 *	0.02	12.76
87002	-2.05 **	-1.46	-0.84 *	0.13	28.1	-0.15	102.24	-243.99	271.52	-0.07	-178.47	658.62	-0.06	-0.03	16.75
87005	-2.83 **	-9.02 **	-2.18 **	0.07	39.55 *	-0.01	296.8	77.57	220.74	-0.17	-69.47	801.95	-0.01	0.01	21.63
87032	-2.72 **	-7.13 *	-0.73	0.03	50.55 *	-0.02	314.02	156.57	-298.82	-0.25	-58.13	-718.16	0	-0.05	-8.79
87071	-2.39 **	-2.68	-1.18 **	-0.12	26.43	-0.07	-58.09	1.68	277.18	-0.3	-37.58	503.62	0.02	0.02	14.47
87081	-2.16 **	5.76	0.27	0.02	63.43 **	0.19	428.8	400.46 *	428.63	0.42*	-83.91	736.51	0.05	0.01	18.13
87130	-2.16 **	0.98	-0.51	-0.01	24.66	-0.13	170.13	38.24	576.85*	0.04	-34.02	1031.73	0.01	0	24.36
87134	-2.39 **	-5.8	-1.18 **	-0.07	54.88 **	0.02	457.13	-47.21	311.96	0.07	-166.25	1053.95	-0.05	-0.01	25.49*
87148	-2.39 **	-0.68	-0.62	-0.06	96.21 **	0.36*	73.24	-150.76	70.41	-0.34	-271.69**	428.18	-0.04	0	13.15
87167	-2.16 **	-0.8	-0.62	-0.07	23.43	-0.13	199.24	217.68	516.29*	0.08	4.09	1000.06	0.04	0.02	23.66
87188	-2.72 **	-4.91	-1.84 **	-0.02	68.43 **	0.12	169.57	188.68	374.96	0.18	-157.02	829.18	0.03	0.03	21.87
87195	-2.83 **	-2.46	-1.18 **	0.13	52.99 **	-0.08	207.24	82.57	243.63	0.27	-163.47	735.4	0.01	0.02	20.21
87214	-2.50 **	-11.57 **	-1.84 **	0.03	33.21	0.16	258.57	-45.21	436.52	-0.01	-109.02	979.4	-0.03	-0.01	24.26
87217	-1.61 **	-2.57	-1.07 *	0.05	44.99 *	-0.05	-311.2	-223.54	23.29	0.08	-249.58*	-820.49	-0.06	-0.06	-13.37
87226	-1.16 *	-0.91	-0.4	0.03	53.55 **	0.03	297.24	53.13	642.07**	-0.03	-117.36	830.18	0	-0.04	18.04
Moisture stress
71074	-2**	1.03	-0.29	-0.09	32.08	-0.17	65.76	-139.99	201.39	-0.44*	-102.22	396.83	-0.05	-0.03	9.99
71080	-2.66**	-1.63	-0.84	-0.02	54.41**	0.06	494.76**	230.34*	406.95*	0.36	8.22	1031.5*	0.03	0.02	23.94**
71085	-2.22**	3.26	-0.73	-0.12	38.75*	-0.01	332.09	42.56	717.39**	-0.01	-63.33	1179.61**	-0.01	-0.02	25.96**
71118	-2.11**	-7.41*	-0.73	-0.12	36.86*	-0.14	137.87	-140.66	-73.5	-0.36	-173.33*	-172.5	-0.08*	-0.06*	-1.05
71134	-1.78**	7.48*	0.82	-0.09	24.08	-0.14	222.98	73.56	144.39	0.13	30.67	197.83	0.02	-0.02	5.7
71174	-2.55**	-0.52	-1.29*	0.04	53.52**	-0.03	171.31	-187.55	665.61**	-0.14	-204.33**	966.61*	-0.08*	-0.05*	22.34**
71178	-1.78**	13.26**	1.16*	0.07	9.19	-0.23	550.87**	346.34**	429.95*	0.15	202.34*	809.5*	0.06	0.01	17.71*
71218	-2.11**	8.26*	0.04	-0.05	9.19	-0.25	199.09	-23.44	484.84**	-0.15	-31.44	813.72*	-0.02	-0.02	18.4*
71220	-1.89**	4.37	0.71	-0.01	-1.48	-0.32*	354.54*	-146.33	70.5	0.11	-111.33	174.72	-0.09*	-0.04	5.69
71268	-2.44**	2.15	0.04	0.04	69.86**	0.14	366.98*	-0.99	464.06*	-0.23	-98.66	650.83	-0.03	-0.04	15.74*
71273	-2.11**	6.59	0.38	-0.01	50.63**	0.1	160.2	-112.88	750.06**	-0.24	-142.55	1039.83*	-0.05	-0.04	22.85**
71281	-1.89**	4.03	0.04	-0.1	53.52**	-0.07	349.87*	117.9	331.84	-0.14	7.56	570.5	0.02	-0.01	13.19
72001	-1.66**	10.15**	0.16	-0.1	31.97	-0.08	222.98	194.34	416.95*	0.64**	-7	769.83	0.04	0.02	16.69*
72030	-2**	3.81	-0.18	-0.14	42.52*	0.04	176.76	-58.55	115.39	0.29	-161.11*	109.28	-0.04	-0.04	4.13
72038	-1.66**	6.26	-0.62	-0.09	42.41*	-0.09	455.76**	233.34*	770.39**	0.04	149.45	1356.06**	0.03	0.01	28.17**
72039	-2.22**	5.81	-0.07	-0.05	48.63**	-0.09	547.76**	303.12**	737.06**	1.15**	-44.22	1414.39**	0.04	0.02	30.46**
72054	-1.44**	3.7	-0.51	-0.1	26.63	-0.19	423.09*	-130.1	828.28**	0.39	-173*	1381.28**	-0.09**	-0.06*	28.12**
72060	-2.11**	7.7*	0.27	-0.12	51.08**	-0.05	588.98**	300.12**	826.06**	1.17**	-36.33	1545.06**	0.05	0.03	32.87**
72066	-1.78**	5.92	0.16	-0.09	25.75	-0.1	481.65**	293.12**	243.5	0.6**	32.56	655.5	0.04	0.02	14.78
72067	-2**	11.03**	1.16*	0.02	6.63	-0.17	472.42**	77.67	488.95**	1.07**	-55.11	1091.06**	-0.03	0	23.62**
72069	-2.11**	3.37	0.38	-0.08	51.08**	-0.07	458.2**	117.9	623.95**	0.24	-18.66	1211.95**	0	0	26.25**
73014	-1.55**	-1.85	-0.84	-0.08	21.63	-0.15	-146.02	-227.22*	390.61*	-0.9**	-129.22	374.39	-0.07*	-0.04	8.79
73023	-1.11**	1.37	-0.29	0.02	-0.59	0.1	-306.58	-460.99**	143.5	-1.14**	-288.55**	-33.39	-0.16**	-0.09**	0.07
73029	-1*	4.92	-0.51	-0.03	35.08*	0.23	169.42	-163.1	430.95*	-1.06**	-61.11	729.95	-0.08*	-0.04	14.5
73046	-2**	7.48*	-0.18	-0.03	9.75	0.03	21.2	-470.22**	217.61	-1.37**	-267.44**	150.06	-0.17**	-0.11**	5.33
73048	-0.89*	4.92	0.16	-0.02	7.97	-0.01	-394.13*	-457.33**	329.84	-1.73**	-234**	65.61	-0.15**	-0.09**	1.57
73052	-2.55**	-0.3	-0.73	-0.07	57.86**	0.26	236.2	-42.66	85.61	-0.33	-72.78	199.61	-0.04	-0.03	6.55
73079	-1.89**	-0.19	-1.29*	-0.04	65.08**	0.07	-99.02	-332.77**	-24.83	-0.88**	-313.78**	-390.39	-0.13**	-0.09**	-5.73
73082	0	6.03	-0.73	-0.03	-14.14	-0.27	-193.46	-455.44**	55.72	-0.9**	-234**	-423.61	-0.15**	-0.09**	-9.38
73086	-1.44**	-4.41	-1.51**	-0.06	-8.92	-0.33*	-407.13*	-394.44**	265.72	-1.2**	-161.22*	-11.61	-0.12**	-0.08**	1.13
73087	-2**	-3.97	-1.51**	-0.13	-19.25	-0.31*	-343.46*	-353.66**	225.28	-1.07**	-106.89	11.5	-0.11**	-0.06**	2.38
74015	5.34**	1.92	1.04*	0.19*	-93.03**	-0.26	-232.24	-49.33	-390.16*	0.01	237.11**	-492.83	0.03	0.03	-16.9*
74411	3.34**	0.92	2.04**	0.18*	-61.59**	0.08	-254.13	152.12	-724.16**	0.51*	234.89**	-1085.94**	0.12**	0.07**	-25.14**
74449	4.45**	-13.3**	1.93**	0.23**	-74.14**	0.11	-579.69**	-11.22	-749.94**	-0.12	158.11*	-1199.94**	0.05	0.06*	-28.19**
74481	4.34**	-0.08	0.82	0.08	-72.03**	0.09	-590.8**	-71.33	-721.5**	0.43*	34.34	-1182.39**	0.02	0.03	-27.73**
74526	4**	-0.41	1.6**	-0.12	-79.37**	0.04	-726.69**	-155.1	-633.5**	0.42	-34.55	-1391.61**	0.02	0.03	-31.3**
74535	3.67**	-1.08	0.38	-0.07	-73.37**	-0.07	-339.35*	8.45	-692.16**	0.26	143	-901.72*	0.06	0.06*	-22.24**
74539	4.67**	2.81	1.27*	0.14	-86.03**	-0.18	-417.69*	95.9	-713.83**	0.09	331**	-1001.83*	0.12**	0.1**	-25.14**
74567	4.11**	-16.52**	0.04	0.11	-83.48**	-0.1	-346.91*	101.12	-632.39**	0.28	280.11**	-849.28*	0.1**	0.09**	-21.78**
74570	4.45**	3.92	1.04*	0.15	-78.81**	-0.16	-408.35*	141.23	-586.83**	0.14	334.11**	-1064.05**	0.14**	0.06*	-25.85**
74574	4**	-4.97	1.04*	0.24**	-62.14**	0.21	-593.69**	-169.44	-922.39**	0.03	-36.11	-1772.83**	-0.01	0	-37.8**
74601	3.89**	0.81	0.93	0.16	-73.03**	0.02	-170.02	185.9	-596.61**	0.49*	287.78**	-863.5*	0.11**	0.06*	-21.6**
74605	4.45**	1.15	0.49	0.15	-78.59**	0.06	-667.46**	85.45	-578.94**	0.25	212.89**	-1386.28**	0.04	0.05	-31.65**
74607	4.22**	-0.41	1.04*	0.16	-70.59**	0.15	-760.46**	-31.88	-883.83**	0.37	139.34	-1870.28**	0.08*	0.04	-39.59**
74614	3.67**	-3.19	0.71	0.18*	-60.48**	0.18	-272.02	-191.22	-762.5**	0.45*	-29	-1354.17**	-0.1**	-0.03	-30.08**
74618	3.22**	-2.52	-1.62**	0.09	-61.25**	0.04	-445.46*	136.56	-774.72**	0.71**	141	-1090.39**	0.04	0.05*	-24.72**
74633	3.56**	-1.52	0.82	0.22**	-58.7**	-0.08	-241.13	97.01	-515.28**	0.62**	163.56*	-626.5	0.08*	0.07**	-17.1*
74685	3.45**	-1.3	1.04*	0.21*	-80.14**	0.09	-742.91**	-179.99	-869.72**	0.17	5.56	-1776.05**	0.01	0.01	-37.58**
74698	5**	4.48	1.04*	0.21*	-83.7**	-0.1	-435.46*	55.9	-937.05**	0.29	210.11**	-1825.39**	0.04	-0.01	-39.21**
74779	4**	-0.74	1.38**	0.16	-77.14**	-0.11	-317.46	126.67	-805.16**	0.46*	253.45**	-1225.5**	0.12**	0.07**	-28.22**
74875	4.11**	0.26	0.93	-0.09	-59.37**	0.14	-244.46	-49.66	-772.61**	0.26	115	-1312.5**	0.04	-0.01	-29.49**
75035	0.89*	-8.85*	1.6**	0.1	-17.14	0.09	-233.02	59.45	-559.94**	-0.1	99.45	-663.28	0.07	0.06*	-14.75
75048	1.22**	-22.97**	2.16**	-0.35**	-16.03	0.45**	-533.02**	-35.33	-594.94**	-0.53*	44.78	-998.17*	0.03	0.04	-20.77**
75064	2.89**	-4.52	2.04**	0.09	-59.7**	0.16	-393.02*	49.78	-416.5*	0.24	71.22	-841.72*	0.04	0.04	-20.31**
75094	1*	-3.3	3.6**	-0.34**	-54.25**	0.19	-227.91	41.56	-758.39**	0.23	129.56	-1152.05**	0.06	0.02	-23.35**
75126	1.56**	-4.41	1.49**	-0.12	-47.25**	0.17	-240.02	105.12	-363.28	0.32	143.34	-642.94	0.05	0.05*	-14.96
75133	3.89**	-4.97	-2.07**	0.11	-35.7*	0.14	-33.13	190.67	-567.5**	0.07	230.34**	-733.05	0.09**	0.05	-19.57*
75134	3.34**	-5.19	1.49**	0.04	-51.37**	0.12	-302.91	-96.77	-689.72**	0.3	0.89	-1120.72**	0	0.02	-25.55**
75156	0.45	-8.52*	0.49	0.11	-54.25**	0.24	-484.24**	-44.1	-600.05**	0.33	0.78	-1154.05**	0.02	0.04	-23.12**
75159	1.22**	-10.08**	1.27*	0.12	-60.37**	-0.05	-414.02*	93.56	-637.5**	0.37	153.45	-921.72*	0.07*	0.07**	-20.06*
75173	2.11**	-7.19*	1.16*	0.2*	-89.37**	-0.34*	-480.02**	-12.33	-534.16**	0.53*	-16	-1096.83**	-0.02	0.02	-24.28**
75180	3.67**	-8.52*	0.93	0.06	-29.37	0.37**	20.76	115.01	-356.5	0.15	118.67	-205.94	0.04	0.05	-9.85
86014	-2**	1.92	-0.51	-0.14	15.19	-0.34*	279.2	135.23	141.39	-0.25	69.34	79.61	0.01	-0.03	3.56
86019	-2.11**	1.26	-1.18*	0.15	46.75**	0.02	230.65	55.45	293.17	-0.22	-49.78	653.28	-0.02	0	15.45*
86025	-2.33**	-0.74	0.16	0.17	21.52	-0.18	594.09**	403.23**	280.06	0.27	11.22	1003.83*	0.07*	0.06*	22.65**
86027	-2.11**	-0.97	-0.96	0.04	46.08**	-0.05	198.42	80.34	443.95*	-0.38	10.67	772.06	0.01	0	17.58*
86042	-2.33**	1.92	-0.84	-0.15	55.52**	0.01	351.42*	-34.66	439.95*	-0.1	-122.11	921.17*	-0.04	-0.02	21.02**
86052	-2.11**	1.81	0.16	0.15	52.97**	0.03	291.54	139.56	365.39*	0.1	-10.33	786.83	0.02	0.02	17.84*
86053	0	11.15**	-0.18	0.1	18.3	-0.01	240.09	291.34**	841.06**	-0.11	157.34*	1211.06**	0.08*	0.03	22.03**
86074	-1.55**	5.15	-0.84	-0.22**	53.75**	0.03	-130.69	115.9	363.61	-0.06	-0.66	362.72	0.07*	0.03	8.87
86096	-1.89**	5.81	-0.73	-0.2*	67.75**	0.12	249.76	-4.1	584.84**	-0.07	-142.66	672.39	-0.05	-0.03	15.1
87002	-2.33**	-2.3	-1.96**	-0.09	36.3*	0.04	203.87	-20.33	10.17	-0.26	-64.55	59.39	-0.03	-0.02	3.94
87005	-2.55**	-3.97	-2.07**	0.07	30.75	-0.15	379.31*	154.45	462.72*	0.24	15.89	971.72*	0.02	0.01	22.43**
87032	-2.66**	-9.41**	-1.51**	-0.05	59.08**	0.03	291.65	12.45	101.61	0.02	-100.11	178.61	-0.02	-0.03	7.04
87071	-2.55**	0.81	-0.73	-0.16	51.08**	0.13	226.09	135.12	333.5	0.19	-32.22	689.39	0.04	0.02	16.96*
87081	-2.22**	7.92*	-0.07	-0.11	73.41**	0.31*	503.2**	219.67*	400.17*	0.45*	-46.44	1033.17*	0.02	0.02	22.96**
87130	-2**	-0.85	-0.96	-0.05	14.63	-0.17	246.42	-167.88	433.84*	0.16	-145.66	810.5*	-0.07*	-0.04	18.06*
87134	-2**	-5.08	-1.84**	0.01	65.97**	0.21	387.87*	-107.44	449.28*	-0.14	-152.89	966.95*	-0.06	-0.03	21.25**
87148	-2.11**	-3.85	-0.96	-0.03	52.19**	-0.03	281.87	12.56	177.84	-0.07	-81.66	283.17	-0.03	-0.02	7.85
87167	-2.22**	0.92	-0.73	-0.16	44.3**	0.01	469.2**	130.9	584.61**	-0.04	-17.11	1183.72**	-0.01	0	26.1**
87188	-2.11**	-2.85	-1.96**	-0.1	60.41**	0.21	363.87*	3.78	129.95	-0.05	-103.89	361.72	-0.01	-0.05	9.62
87195	-2.22**	-2.08	-2.96**	-0.04	26.3	-0.24	92.42	-105.44	172.95	0.07	-137.89	394.83	-0.04	-0.02	10.4
87214	-2.44**	-1.85	-1.73**	0.03	36.3*	0.31*	171.42	-70.99	289.17	-0.51*	-26	589.83	-0.03	-0.01	14.61
87217	-2.11**	1.26	-1.62**	-0.06	71.41**	0.11	397.87*	51.9	606.06**	-0.88**	-99.55	1133.72**	-0.02	-0.01	24.67**
87226	-1.33**	-0.3	-0.73	-0.08	70.08**	0.13	16.42	-206.77*	672.5**	-0.51*	-228.33**	818.28*	-0.08*	-0.06*	17.13*
Across control and moisture stress treatments
71074	-2.03	1.81	-0.15	-0.12	8.78	-0.33	-135.7	-2.3	142.5	-0.35	-77.3	154	-0.05	-0.04	6.35
71080	-2.75	0.08	-0.76	0.03	44.61	-0.14	140.3	266.7	266.5	0.36	-74.6	533.8	0.02	0	15.54
71085	-2.41	4.86	-0.32	-0.09	38.38	-0.02	153.9	340.6	541.4	-0.08	-30.3	932.1	0	-0.02	22.88
71118	-1.91	-0.36	-0.43	-0.13	27.5	-0.19	-23.3	-20.4	144.8	-0.18	-89.8	87.5	-0.02	-0.02	4.65
71134	-1.53	10.92	1.24	-0.02	5.05	-0.32	172.9	150.5	402.5	0.12	87	485.9	0.03	0	11.06
71174	-2.19	0.53	-0.87	-0.04	58.28	0	-130.6	51.9	350.1	-0.07	-216.7	462.9	-0.05	-0.03	13.33
71178	-1.58	9.47	0.8	0.07	33.18	-0.09	697.6	794.4	480	0.3	129.2	1276.9	0.06	0.04	27.42
71218	-2.14	7.36	-0.15	-0.13	8.61	-0.24	-55.2	67.3	351.7	0.02	-90.8	467.4	-0.03	-0.03	12.82
71220	-1.86	6.7	0.96	0.13	5.5	-0.13	-5.7	210.5	108.7	0.1	-66.6	246.3	-0.04	-0.03	7.71
71268	-1.91	3.03	0.3	0.03	52.33	-0.02	68.3	258.7	428.2	-0.37	-47.4	704.4	-0.02	-0.02	16.82
71273	-2.14	4.7	0.13	-0.04	47.33	0	89.3	228.1	437.3	-0.18	-91.1	588.1	-0.01	-0.02	15.33
71281	-1.69	5.14	0.3	0	43.28	-0.12	-37	170.5	472	-0.2	-94.7	704.9	-0.03	-0.02	15.85
72001	-1.64	6.03	-0.15	0.02	30.33	-0.2	329.6	419.6	392.7	0.74	-33.4	811.8	0.02	0.01	18.28
72030	-1.91	1.81	-0.09	-0.09	46.67	0.02	92.1	228.4	197	0.27	-143.6	417.8	-0.02	-0.01	11.27
72038	-1.8	4.75	-0.32	-0.02	39.22	-0.14	375	478.4	629	0.39	56.7	1106.8	0.03	0	24.53
72039	-1.91	6.25	0.13	-0.07	25.05	-0.19	341.1	463.7	516.4	0.9	-19	1027.3	0.03	0.01	23.29
72054	-1.41	3.97	-0.09	-0.03	27.33	-0.19	295.2	464.8	589.9	0.58	-26.9	1060.6	0	0	22.88
72060	-1.86	3.25	0.46	-0.08	29	-0.2	362	475.8	516.5	1.07	-27.4	991.7	0.04	0.02	22.22
72066	-1.97	3.53	0.41	-0.02	14.89	-0.2	372.2	443.1	419.2	0.69	41.7	943.4	0.04	0.02	21.86
72067	-1.64	6.53	0.52	0.04	-7.72	-0.39	312.7	458.9	352.6	0.75	89.8	810.7	0.02	0.01	18.25
72069	-2.19	0.92	0.35	0.01	37.11	-0.14	123.5	372.8	497.3	0.28	-69.4	869.5	-0.01	-0.02	20.82
73014	-1.47	0.47	-0.32	-0.03	32.11	0.02	-345.8	-276.4	370.9	-0.82	-165.1	93.8	-0.08	-0.07	3.96
73023	-0.53	5.03	0.18	0	4.72	-0.01	-395.6	-323.4	283.7	-0.82	-216.4	-40.5	-0.1	-0.08	-0.82
73029	-1.3	6.31	-0.04	0.01	15.5	0.03	-186.5	28.5	364.8	-0.8	-76.2	392.4	-0.07	-0.06	9.35
73046	-1.3	6.97	0.52	0.02	21.94	-0.01	-366.9	-144.3	442.8	-1.34	-196.6	357.7	-0.11	-0.08	8.36
73048	-0.47	6.25	0.24	-0.06	17.17	0.03	-426.4	-306.3	399.9	-1.45	-149.2	96.1	-0.12	-0.09	2
73052	-2.53	1.25	-0.32	-0.04	51.5	0.26	-212.3	39.7	280.2	-0.46	-172.9	316	-0.07	-0.05	10.34
73079	-1.75	1.25	-0.54	0.06	56.17	0.03	-186.7	-88.2	187.7	-0.57	-230.8	125.3	-0.07	-0.04	5.14
73082	0.03	8.14	-0.82	0.02	1.39	-0.27	-103.9	114.9	533.4	-0.52	-83.8	566.4	-0.07	-0.06	9.82
73086	-1.03	1.03	-0.93	0	3	-0.23	-449.8	-426.9	204.1	-0.89	-195.9	-249.3	-0.1	-0.08	-3.37
73087	-1.8	-1.08	-1.26	-0.07	3.17	-0.22	-374.9	-307	234.3	-0.69	-188.4	-73.5	-0.1	-0.07	1.41
74015	5.25	5.42	0.91	0.1	-76.61	-0.18	-149.4	-222.8	-384.9	-0.09	209.7	-548.9	0	0.01	-19.33
74411	2.64	-0.19	1.52	0.1	-65.59	0.04	-105.6	-421.6	-798.7	0.01	183.9	-1202.1	0.04	0.05	-27.07
74449	4.14	2.45	1.46	0.15	-77.39	0.06	-254.2	-446.5	-729.7	-0.18	128.8	-1230.7	0	0.02	-30.32
74481	3.48	3.58	0.46	0.04	-60.5	0.17	-123	-390.8	-640.5	0.09	94.8	-1031.4	0.02	0.03	-25.42
74526	3.64	1.31	1.18	0.06	-51.26	0.26	-225.4	-502.3	-589.5	0.19	-9.4	-1105.1	0.01	0.02	-27.64
74535	4.48	3.2	1.02	0.05	-73.5	-0.07	-108.5	-358.4	-662.8	0.17	192.1	-1021.8	0.03	0.04	-26.7
74539	3.48	-1.42	0.07	0.05	-57.56	0.07	-198.2	-329	-590.3	0.02	40.6	-917.3	-0.01	0.01	-23.62
74567	3.98	4.47	0.8	0.09	-71	0.06	-57.5	-323.3	-523.5	-0.06	232.5	-853.3	0.05	0.03	-22.97
74570	3.92	-3.1	0.02	0.08	-77.06	-0.03	-120.6	-468	-717.7	0.16	190.4	-1200.4	0.06	0.06	-29.26
74574	4.09	-2.19	0.46	0.12	-70.56	0.06	-177.9	-320.5	-714.9	-0.02	130.9	-1036.9	0	0.02	-26.35
74601	3.81	1.14	1.02	0.08	-52.39	0.18	-210.2	-230.2	-509.4	0.2	11.6	-715.2	0	0.01	-20.38
74605	4.2	-0.58	0.35	0.1	-64	0.2	-179.6	-497.1	-739.8	0.17	127.7	-1229.9	0.03	0.03	-29.92
74607	4.03	-1.86	0.46	0.09	-73.33	0.09	-193.2	-388.2	-591.9	-0.07	132.5	-927.6	0.02	0.04	-24.68
74614	3.09	-2.25	0.64	0.06	-53.67	0.17	-115.6	-204.4	-544.5	0.32	55.5	-732.8	0.01	0.03	-19.83
74618	3.2	0.75	0.63	0.1	-62.11	0.23	-125.3	-95.4	-512	0.41	105.7	-591.5	-0.01	0.01	-17.51
74633	3.31	-0.08	0.85	0.11	-58.7	0.26	-182	-254.4	-542.5	0.22	34.2	-811.3	-0.01	0.01	-20.4
74685	3.86	-0.08	0.74	0.09	-69.67	0.15	-343.5	-558	-802.3	-0.19	-2.6	-1396.2	-0.02	0.01	-32.5
74698	4.48	2.58	0.52	0.09	-77.17	-0.05	-74.1	-151	-540.1	0.08	196.9	-629.1	0.03	0.04	-19.9
74779	4.2	3.25	1.02	0.07	-62.5	0.03	-46.9	-223.8	-553.4	0.08	175.4	-777.9	0.04	0.04	-22.48
74875	4.25	0.47	1.02	0.09	-68.84	0.14	-292.1	-303.5	-520.3	0.13	82.2	-773.7	-0.02	0	-22.07
75035	0.98	-13.97	0.74	-0.11	-28.45	0.26	19.3	-314.2	-769.1	-0.1	116	-1100.2	0.06	0.07	-23.2
75048	1.75	-12.2	1.35	-0.25	-30.5	0.47	-39.7	-448.4	-643.8	-0.68	196.8	-1103.2	0.06	0.05	-23.71
75064	3.14	-9.82	0.91	-0.12	-36.39	0.32	96.7	-295.6	-526.2	-0.08	193.9	-811.2	0.08	0.06	-21.57
75094	1.31	-7.36	2.3	-0.03	-49.64	0.26	-20.7	-310.9	-613.2	0.12	137.2	-964.8	0.04	0.04	-21.08
75126	3.42	-12.47	-0.36	-0.06	-47.95	0.06	-4.7	-180	-572.3	-0.18	208.4	-732.9	0.04	0.04	-19.99
75133	2.09	-11.81	0.68	-0.04	-63.08	-0.05	204.5	-143.5	-529.9	0.3	280.2	-744.7	0.08	0.07	-18.38
75134	3.14	-11.47	0.24	-0.13	-59.78	0.1	-52.4	-380.6	-634.8	0.17	134.8	-1060.5	0.04	0.04	-25.42
75156	1.53	-14.81	0.52	-0.08	-42.22	0.26	134.2	-214.3	-514	0.02	206.5	-728.2	0.08	0.06	-17.46
75159	0.48	-14.75	-0.2	-0.07	-45.51	0.25	23.9	-340.5	-735	0.09	207.6	-1067	0.06	0.06	-21.93
75173	2.09	-12.53	0.68	0	-62.8	-0.04	230.4	-127.4	-529.5	0.43	338.9	-649.8	0.1	0.08	-16.84
75180	3.14	-14.81	0.07	-0.12	-41.83	0.3	239.6	-55	-505.4	-0.06	295.2	-607.4	0.08	0.07	-17.61
86014	-2.25	1.7	-0.32	-0.07	20.72	-0.26	117.8	249.4	178	0.01	-35.8	338.6	-0.01	0	10.5
86019	-2.19	-0.58	-0.98	0.12	45.44	0	241.8	315	264.7	0.02	-26.5	578.8	0.01	0	15.27
86025	-2.08	2.36	0.24	0.25	44.71	0.02	255.9	313	188.8	0.5	-42.7	501.2	0.04	0.02	13.25
86027	-2.08	1.2	-0.76	0.16	61.11	0	215.5	282.1	413.1	-0.07	-86.5	759.9	0.01	0	17.98
86042	-2.19	1.25	-0.54	-0.13	39.94	-0.02	82.4	249.9	410.1	0.12	-103.2	680.1	-0.01	-0.02	16.95
86052	-2.19	3.64	-0.15	0.23	46.78	-0.05	288.4	219.4	228.3	0.67	-40	447	0.05	0.03	12.5
86053	0.14	10.47	-0.2	0.18	11.11	-0.12	477.5	380.5	734.3	0.35	135.9	1074.6	0.08	0.02	19.06
86064	-1.64	4.36	-0.65	-0.14	42.11	-0.1	258.6	-10.2	358.2	0.12	18.3	322.5	0.07	0.02	8.94
86096	-1.97	7.03	-0.43	-0.14	62.94	0.04	402	354.7	540.6	0.37	-62.7	908.4	0.04	0.01	21.21
87002	-2.19	-2.36	-1.43	0.01	29.28	-0.09	-54.7	80.2	158.1	-0.17	-109.1	264.7	-0.03	-0.02	8.72
87005	-2.69	-6.97	-2.15	0.06	32.22	-0.11	47.6	265.2	211.8	0.02	-72.6	476.2	-0.02	-0.01	14.27
87032	-2.69	-8.75	-1.15	-0.02	51.89	-0.03	16.1	230	167.3	-0.12	-124.9	318.9	-0.03	-0.02	11.36
87071	-2.47	-1.42	-0.98	-0.15	35.83	0	0	11.1	175.4	-0.06	-80.7	185.8	0.01	-0.01	7.96
87081	-2.19	6.36	0.07	-0.05	65.5	0.22	241.6	393.1	439.6	0.43	-111	840	0.01	0	20.33
87130	-2.08	-0.42	-0.76	-0.04	16.72	-0.18	-87.8	135.4	375.4	0.09	-102.3	510.4	-0.04	-0.04	13.45
87134	-2.19	-5.92	-1.54	-0.04	57.5	0.09	-145.8	349.6	250.7	-0.04	-205.4	599.8	-0.08	-0.05	15.61
87148	-2.25	-2.75	-0.82	-0.06	71.28	0.14	-137.5	104.7	129.8	-0.21	-222.5	224.5	-0.06	-0.03	8.26
87167	-2.19	-0.42	-0.7	-0.12	30.94	-0.09	105.8	261.3	420.5	0.01	-52.3	681.2	-0.01	-0.02	17.12
87188	-2.41	-4.36	-1.93	-0.07	61.5	0.13	57.8	193.8	259.4	0.05	-160.3	475.9	0	-0.02	13.79
87195	-2.53	-2.75	-2.09	0.03	36.72	-0.19	-79.9	77	78.3	0.16	-196.5	154.4	-0.04	-0.03	7.55
87214	-2.47	-7.19	-1.82	0.02	31.83	0.2	-126.5	142.1	232.9	-0.26	-113.3	373.9	-0.05	-0.04	11.68
87217	-1.86	-1.14	-1.37	-0.01	55.28	0	-83.1	186	330	-0.15	-161.9	489.2	-0.04	-0.03	12.53
87226	-1.25	-1.08	-0.59	-0.04	58.89	0.05	-131.4	84	698.1	-0.27	-203	828.9	-0.06	-0.06	17.87
FT: Time to 75% flowering (d); PH: Plant height (cm); PL: Panicle length (cm); PD: Panicle diameter (cm); PN: Panicle number ('000/ha); TN: Tiller number per plant; TGW: 1000-Grain mass (g); GNP: Grain number/panicle; PY: Panicle yield (kg/ha); GY: Grain yield (kg/ha); DSY: Dry stover yield (kg/ha); BM: Biomass yield (kg/ha); PHI: Panicle harvest index (%); VGI: Vegetative growth index (kg/ha/d);…
***Significant at 0.001 level of probability; ** Significant at 0.01 level of probability; * Significant at 0.05 level of probability
