# Supplementary material for: Discerning combining ability loci for divergent environments using chromosome segment substitution lines (CSSLs) in pearl millet
Source: PLoS One. 2019 Aug 28;14(8):e0218916. doi: 10.1371/journal.pone.0218916 (PMC6713397; doi:10.1371/journal.pone.0218916)
Supplement: S2 Table — (XLS) [file pone.0218916.s002.xls]

## Sheet: Suppl 2
Table S2 The simultaneous effects of each combining ability loci on multiple traits in in control (CN), and moisture stress (MS) and across two moisture regimes (AMR) in summer 2010
GCA/SCA loci identified in CN, MS and AMR	Xpsmp716	Xpsmp2076	Xpsmp318	Xpsmp2078	Xpsmp2074	Xctm8	Xpsmp2214	Xpsmp2249	Xctm25
GCA_CN	FT,PN,DSY,VGI	DSY	PH	PH,PD	PL	PL			GNP
GCA_MS	FT,PN,PY,DSY,BM,VGI	FT,GNP				PL	GY,TGM,PHI,GHI	GY,TGM,PHI,GHI
GCA_AMR	FT,PN,DSY,BM,VGI			PH			TGM,PHI,GHI	TGM,PHI,GHI
SCA_H77_CN	TGM,GY,GNP,PHI,GHI	GY,GNP,PHI,GHI
SCA_H77_MS	TGM
SCA_H77_AMR
SCA_PPMI_CN	PL,PD,FT,TGM	FT
SCA_PPMI_MS	PL,PD,PN
SCA_PPMI_AMR	PH,PL,PY,PHI
SCA_RIB_CN	PL,PD,TGM,PY,GY,GNP,PHI,GHI	GNP,PHI,GHI
SCA_RIB_MS	PL,PD,TGM
SCA_RIB_AMR
FT: Time to 75% flowering (d); PH: Plant height (cm); PL: Panicle length (cm); PD: Panicle diameter (cm); PN: Panicle number ('000/ha); TN: Tiller number per plant; TGW: 1000-Grain mass (g); GNP: Grain number/panicle; PY: Panicle yield (kg/ha); GY: Grain yield (kg/ha); DSY: Dry stover yield (kg/ha); BM: Biomass yield (kg/ha); PHI: Panicle harvest index (%); VGI: Vegetative growth index (kg/ha/d);…
